# Supplementary material for: Sirolimus for Angiomyolipoma in Tuberous Sclerosis Complex or Lymphangioleiomyomatosis
Source: Atypon-hosted journal article supplement (doi:10.1056/nejmoa063564), 2008-01-09
Supplement: nejm_bissler_140sa1.pdf [file nejm_bissler_140sa1.pdf]

## Supplementary Appendix

This appendix has been provided by the authors to give readers additional information about their work.

Supplement to: Bissler JJ, McCormack FX, Young LR, et al. Sirolimus for angiomyolipoma in tuberous sclerosis complex or lymphangioleiomyomatosis. *N Engl J Med* 2008;358:140-51.

On Line Supplemental Data

Table S1. Relationship between angiomyolipoma size and response to sirolimus.

| <b>Angiomyolipomas</b>              | <b>N</b> | <b>Percent of baseline at 12 month</b> | <b>95% Confidence Limits</b> |       |
|-------------------------------------|----------|----------------------------------------|------------------------------|-------|
| small < 6.5 cc <sup>3</sup>         | 7        | 52.9%                                  | 40.9%                        | 64.9% |
| medium (6.5 to 85 cc <sup>3</sup> ) | 6        | 52.0%                                  | 39.0%                        | 64.9% |
| large > 85 cc <sup>3</sup>          | 7        | 54.6%                                  | 42.6%                        | 66.7% |

The angiomyolipoma volumes were divided into 3 categories: small (less 6.5 cc<sup>3</sup>), medium (6.5-85cc<sup>3</sup>), and large (greater than 85cc<sup>3</sup>) and analyzed to determine if the response to sirolimus was associated with baseline AML size. No differences were detected. The table shows that at the 12 month follow-up all three categories were approximately half the original size.

Figure 1S.

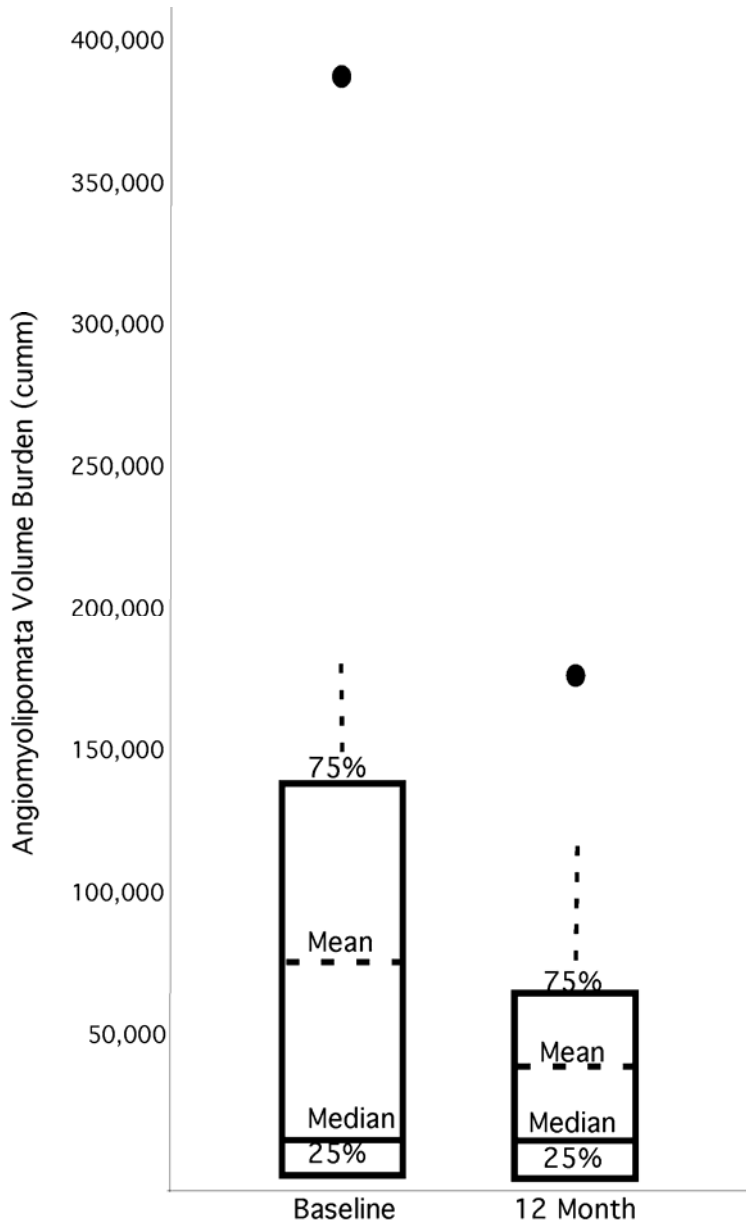

Figure S1 legend. Side-by-side box plot of angiomyolipoma volume burden at baseline and 12 months. Top horizontal line of each box is the 75<sup>th</sup> percentile, the middle hashed line is the mean of the sample values, lower solid line is the median, and lowest horizontal line of the box is the 25<sup>th</sup> percentile. The vertical dashed lines, called whiskers, extend from the box as far as the sample values extend, to a maximum distance of 1.5 interquartile ranges; any value more extreme than this is marked with a solid black dot. Note the change between the baseline and 12 month time points.
